# Supplementary material for: Enhancing cognitive combat readiness: Gamers’ Behaviours concentrating on convergent learning style, tacit-latent, and kinetic-active knowledge acquisitions
Source: Frontiers journal article supplement (doi:10.3389/feduc.2022.1062922), 2022-11-28
Supplement: Data_Sheet_1.docx [file Data_Sheet_1.docx]

**Appendix A:** MeasuredVariables and Item Questions

| **Variables** | **Item Questions** |
| --- | --- |
| Learning Styles; Manolis et al. (2013); Van der Lingen et al. (2020) | When I learn, I like to watch and listen |
| When I learn, I like to think about ideas |
| I learn best when I trust my hunches and feelings |
| I learn best when I listen and watch carefully |
| I learn best when I rely on logical thinking |
| When I am learning, I have strong feelings and reactions |
| When I am learning, I tend to reason things out |
| I learn by feeling |
| I learn by watching |
| I learn by doing |
| When I am learning, I am an observing person |
| When I am learning, I am a logical person |
| I learn best from observation |
| I learn best from a chance to try out and practice |
| I learn best when I can try things out for myself |
| When I learn, I like to observe |
| When I learn, I like to be active |
| Tacit Knowledge Acquisition; Thomas and Gupta (2021); Wang et al. (2020) | I have acquired innovation management skills from cumulative game matches |
| I have acquired my development skills from cumulative game matches |
| I have acquired technical gaming skills from cumulative game matches |
| Material Knowledge Acquisition; Dodd et al. (2005); Park and Moon (2003) | MOBA games, such as DOTA, Arena of Valor, and Mobile Legends: Bang Bang, has content of: |
| Is there a game that is impossible to cheat among these game lists? |
| Most popular MMORPG games in Indonesia are from which device? |
| Grand Theft Auto is what genre of game? |
| Usually, what device type is eFootball PES 2021 played? |
| This game is most associated with a cheat or MOD games: |
| Call of Duty is what genre of game? |
| Which game should be played with a team, ideally? |
| What is the playing method typically used for MOBA games? |
| Among Us is categorised as what genre of game? |
| ***Note:** For material knowledge, all questions had four multiple-choice answers to choose from | |
| Actor Knowledge Acquisition; Breen and Lindsay (1999); Visser-Wijnveen et al. (2016) | I am not confident about my ability to succeed in in-game matches |
| I was quickly successful in understanding the game’s interface and ruleset |
| It is not essential to me whether my partners in the gaming environment recognise me for my excellent understanding of the game’s interface and ruleset |
| Other expectations of me influenced my decision to understand the game’s interface and rule set comprehensively |
| Learning the game’s interface comprehensively and the ruleset is not satisfying |
| I feel actively involved among my gaming partners in comprehensively understanding the game’s interface and ruleset |
| Learning the game’s interface comprehensively and the ruleset is not interesting |
| As far as I know, The game’s interface and ruleset are flexible |
| I feel that I am not familiar with understanding the game’s interface and rule set comprehensively |
| An efficient explanation of the game’s interface and the ruleset is important to me |
| The quality of tutors or partners is not essential for me to comprehensively understand the game’s interface and ruleset |
| The quality of resources is crucial to me in comprehensively understanding the game’s interface and ruleset |
| The content of the game’s interface and the ruleset is not essential to me in comprehensively understanding the game’s interface and ruleset |
| Personal support from a tutor or gaming partner is vital for me to understand the game’s interface and ruleset |
| Communication with a partner or other player is not necessary to me understand the game’s interface and ruleset comprehensively |
| Partner participation in supporting to develop of the understandable game’s interface and the ruleset is important to me |
| Elastic/Kinetic Knowledge; Giampaoli et al. (2017); Gray (2001) | Dealing with novel ideas and issues in any gaming condition |
| Bypassing creative new solutions to in-game challenges (reverse-coded) |
| Looking at new and unsolved problems in-game challenges |
| Trying to understand the overcome solution from previous game matches |
| Accessing conventional wisdom from every game challenge |
| More likely to “recreate the wheel” when playing games (reverse-coded) |
| Actively seeking specific solutions from every game challenge |
| Systematically investigating a particular issue from every game challenge |
| Searching out answers to a given question from every game challenge |
| Receiving unexpected help when playing games |
| Absorbing ideas that happen to emerge from every game challenge |
| Likely to disregard unsolicited ideas from every gaming challenge (reverse-coded) |

**Appendix B**: Treatment Designs: Experimental Procedure

This research uses two methods to measure gamers’ cognitive combat readiness. The first method is a transformed questionary adopted from combat readiness. Furthermore, the second one is a four-measurement constructed from the contents of the combat readiness questionary. It used scores produced by the Clash Royale game, and we calculated the mean score value.

This study transforms cognitive combat readiness’ questionnaire items into the manipulated variables treated for respondents in the game “Clash Royale.” As a result, the authors believe that these measurements can comprehensively reflect gamers’ cognitive combat readiness. Furthermore, this study argues that Clash Royale’s genre is a real-time strategy for players to arrange their troops based on card collection before the game match. Therefore, the authors reform these questionnaire items below.

| Cognitive Combat Readiness; Griffith (2006); Laanepere et al. (2021) | How much confidence do you have in fellow gamers’ preparation for the match? |
| --- | --- |
| How much confidence do you have in your preparation for the game match? |
| How much confidence do you have in fellow gamers’ skills and abilities during a match? |
| How much confidence do you have in your unit’s primary weapons? |
| How much confidence do you have in any condition of your unit’s primary weapons? |
| How much confidence do you have in your unit’s ability to use its weapons? |
| How much confidence do you have in fellow gamers leading your unit during the match? |
| How much confidence do you have in your unknown fellow gamers leading your unit during the match? |
| How much confidence do you have in the unit’s preparation for the game match? |

This study’s experiment adopts a combat readiness measure as a dominant measurement reformulated into four scorings. Specifically, this reformulation of gamers’ confidence actualises in four facilities in the game. For the first menu, the average deck’s score indicates the cycle cards’ ideal cost and optimal score for summoning their cards in-game matches. Second, the amount of gold and gems reveal as a currency for upgrading card level and boosting the chance of unfounded cards. Third, the battle deck combinations’ numbers show players’ realised strategy in their composite decks. It also depicts players’ confidence and consistency in their battle decks. Fourth, the match result reflects their combat readiness output. By this explanation, clash royale’ users fundamentally combine these resources to reflect their gaming ability.

Designing treatment and data collection using the Clash Royale game, the authors divide two groups focusing on participating in the in-game match and collecting participants’ data manually. In other words, this study uses a field experiment to capture gamers’ cognitive combat readiness. Before the investigation started, the researcher ascertained that respondents were from mental fatigue. Then, the authors place four participants in each game, matching “2vs2” with 33 game matches in the gaming group. Furthermore, the researchers accommodate four devices and two players to facilitate this experiment. We also give, for example, 10,000 gold and 500 gems as a part of the research treatment. Specifically, the authors provide five minutes for the participant’s deck to prepare before a game match. In this preparation period, the authors measure the critical event of participants’ cognitive combat readiness. In other words, this study measures participants’ cognitive combat readiness by pointing out categories of average decks’ score, the amount of using given gold and gems, the number of battle deck combinations, and the battles’ results, as consequenced by cell designs. Thus, this study reconstructs the nine items questionnaire of cognitive combat readiness into four transformed manipulative treatments below.

| **Direct Measures:** Cognitively Combat Readiness. | **Manual Scoring of Clash Royale in the “2vs2” Gaming Gr** |
| --- | --- |
| Average Decks’ Score: 3.0-4.0 |
| Amount of Gold and Gems (+) |
| Numbers of battle deck combinations (-) |
| Battle Result: Win (1) or Lose (0) |

This study develops scoring systems to measure gamers’ cognitive combat readiness. Next, it manipulates these scoring outputs, transforming them to a Likert 5-point scale. First, in the scoring systems of the gold and gems spending, battle deck-combined numbers, and battle-match results, the authors simplify each of these measures into a binomial score. Second, we weigh each binomial score by 1/3, reaching a maximum value of 1-point. Third, in the average deck’s score, we use the inverted-U curve, with participants gaining 3.0-4.0 as the ideal deck’s score scored by a 4-point scale as the maximum value. Finally, this deck score is added by three other ones to a ceiling point of five, reflecting the highest participants’ cognitive combat readiness.
